# Supplementary material for: Using RNA sequencing to characterize female reproductive genes between Z and E Strains of European Corn Borer moth (Ostrinia nubilalis)
Source: PubMed Central journal article supplement (PMC4007636; doi:10.1186/1471-2164-15-189), 2014-03-12

a.

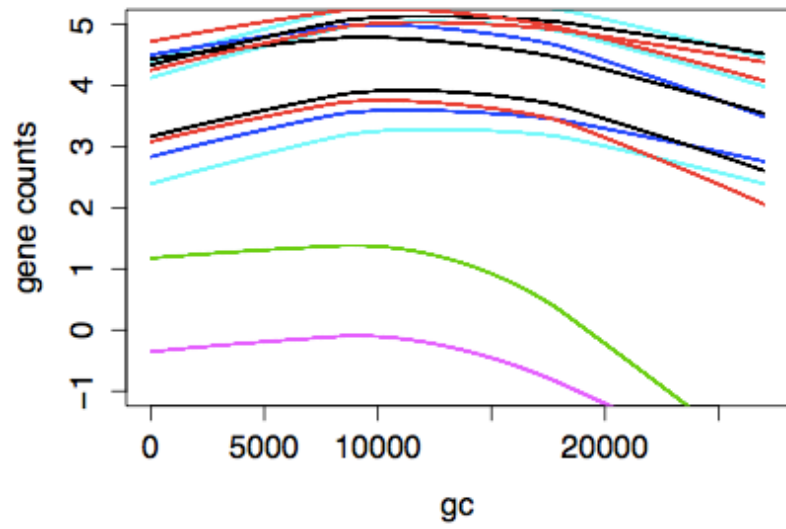

b.

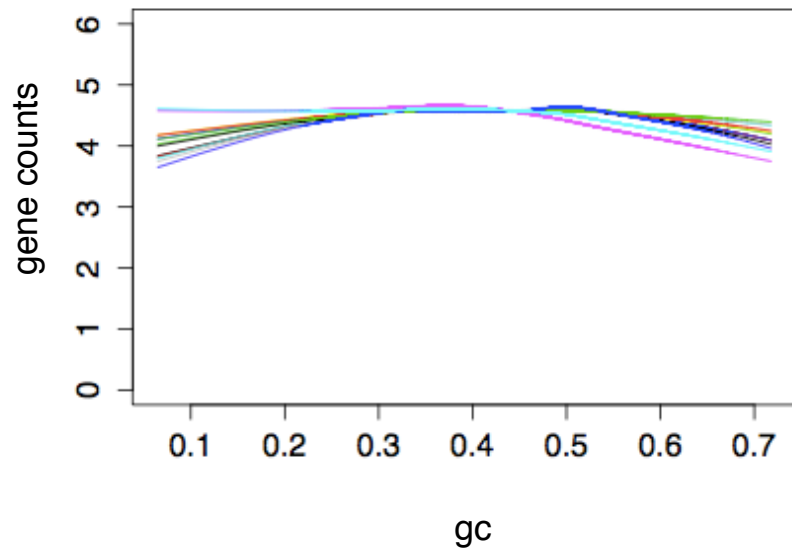

Supplement: 12864_2013_7027_MOESM2_ESM.pdf [file 12864_2013_7027_MOESM2_ESM.pdf]
