# Supplementary material for: Using RNA sequencing to characterize female reproductive genes between Z and E Strains of European Corn Borer moth (Ostrinia nubilalis)
Source: PubMed Central journal article supplement (PMC4007636; doi:10.1186/1471-2164-15-189), 2014-03-12
Supplement: 12864_2013_7027_MOESM4_ESM.pdf [file 12864_2013_7027_MOESM4_ESM.pdf]

Supplementary table 1. **Characterizing Reproductive Function of the Bursa copulatrix and Bursal gland Tissue.** Gene ontology classes in the bursa copulatrix, the bursal gland, and in both tissues compared to the female thorax. Each list of gene ontology categories is in alphabetical order.

Supplementary Table 1.

| <b>Bursal Gland GO Term</b>                              | <b>Bursal Gland GO Term Continued</b>         | <b>Bursa copulatrix GO Term</b>                                 | <b>Both GO Term</b>                                  |
|----------------------------------------------------------|-----------------------------------------------|-----------------------------------------------------------------|------------------------------------------------------|
| actin binding                                            | mitochondrial inner membrane                  | actomyosin structure organization                               | actin cytoskeleton organization                      |
| actin cytoskeleton                                       | mitochondrial membrane part                   | cellular component organization or biogenesis at cellular level | actin filament-based process                         |
| adherens junction                                        | mitochondrial respiratory chain               | cellular respiration                                            | ATP synthesis coupled electron transport             |
| anatomical structure development                         | mitochondrial respiratory chain complex I     | contractile fiber                                               | cellular component organization or biogenesis        |
| anatomical structure formation involved in morphogenesis | morphogenesis of an epithelium                | contractile fiber part                                          | cellular macromolecular complex subunit organization |
| anatomical structure morphogenesis                       | morphogenesis of embryonic epithelium         | DNA metabolic process                                           | cytoplasm                                            |
| anchoring junction                                       | multicellular organism reproduction           | electron transport chain                                        | cytoplasmic part                                     |
| biological regulation                                    | multicellular organismal development          | energy derivation by oxidation of organic compounds             | cytoskeleton organization                            |
| cell                                                     | multicellular organismal reproductive process | head segmentation                                               | gene expression                                      |
| cell development                                         | NADH dehydrogenase complex                    | I band                                                          | generation of precursor metabolites and energy       |

|                                                                 |                                                   |                                                        |                                                                                           |
|-----------------------------------------------------------------|---------------------------------------------------|--------------------------------------------------------|-------------------------------------------------------------------------------------------|
| cell differentiation                                            | negative regulation of biological process         | intracellular non-membrane-bounded organelle           | intracellular                                                                             |
| cell migration                                                  | negative regulation of cellular process           | mitochondrial ATP synthesis coupled electron transport | intracellular organelle                                                                   |
| cell motility                                                   | nucleus                                           | mitochondrial matrix                                   | intracellular organelle part                                                              |
| cell part                                                       | organ development                                 | mitochondrial part                                     | intracellular part                                                                        |
| cellular component organization                                 | organ morphogenesis                               | mitochondrion                                          | macromolecular complex                                                                    |
| cellular component organization at cellular level               | organelle envelope                                | muscle cell differentiation                            | NADH dehydrogenase (quinone) activity                                                     |
| cellular component organization or biogenesis at cellular level | organelle inner membrane                          | myofibril                                              | NADH dehydrogenase (ubiquinone) activity                                                  |
| cellular developmental process                                  | oxidoreductase activity, acting on NADH or NADPH  | myofibril assembly                                     | NADH dehydrogenase activity                                                               |
| cellular process                                                | post-embryonic morphogenesis                      | non-membrane-bounded organelle                         | organelle                                                                                 |
| cellular process involved in reproduction                       | post-embryonic organ morphogenesis                | respiratory electron transport chain                   | organelle organization                                                                    |
| cellular protein metabolic process                              | protein complex                                   | ribosome                                               | organelle part                                                                            |
| cytoskeletal protein binding                                    | protein localization                              | sarcomere                                              | oxidative phosphorylation                                                                 |
| developmental process                                           | protein modification by small protein conjugation | sarcomere organization                                 | oxidoreductase activity, acting on NADH or NADPH, quinone or similar compound as acceptor |

|                                                |                                                              |                                      |  |
|------------------------------------------------|--------------------------------------------------------------|--------------------------------------|--|
| developmental process involved in reproduction | protein modification by small protein conjugation or removal | striated muscle cell differentiation |  |
| dorsal closure                                 | protein modification by small protein removal                | structural constituent of ribosome   |  |
| embryonic morphogenesis                        | protein transporter activity                                 | structural molecule activity         |  |
| establishment or maintenance of cell polarity  | regulation of biological process                             | translation                          |  |
| gamete generation                              | regulation of cellular component organization                | Z disc                               |  |
| germ cell development                          | regulation of cellular process                               |                                      |  |
| Golgi apparatus                                | respiratory chain                                            |                                      |  |
| imaginal disc development                      | respiratory chain complex I                                  |                                      |  |
| imaginal disc morphogenesis                    | rhabdomere development                                       |                                      |  |
| initiation of dorsal closure                   | sensory organ development                                    |                                      |  |
| instar larval or pupal development             | sexual reproduction                                          |                                      |  |
| instar larval or pupal morphogenesis           | small GTPase mediated signal transduction                    |                                      |  |
| intracellular membrane-bounded organelle       | system development                                           |                                      |  |
| localization                                   | tissue development                                           |                                      |  |
| localization of cell                           | tissue morphogenesis                                         |                                      |  |

|                            |                    |  |  |
|----------------------------|--------------------|--|--|
| macromolecule localization | tube development   |  |  |
| membrane-bounded organelle | tube morphogenesis |  |  |
| metamorphosis              |                    |  |  |
| mitochondrial envelope     |                    |  |  |
